# Supplementary material
Source: PubMed Central journal article supplement (PMC4615593)
Supplement: krnb-12-08-1058477-s001.pdf [file krnb-12-08-1058477-s001.pdf]

**SUPPLEMENTARY INFORMATION TO THE MANUSCRIPT ENTITLED:**

**Immature large ribosomal subunits containing the 7S pre-rRNA can engage in translation in *Saccharomyces cerevisiae***

Olga Rodríguez-Galán<sup>1,2</sup>, Juan J. García-Gómez<sup>1,2</sup>, Dieter Kressler<sup>3</sup>, and Jesús de la Cruz<sup>1,2,4</sup>

<sup>1</sup>Instituto de Biomedicina de Sevilla, Hospital Universitario Virgen del Rocío/CSIC/Universidad de Sevilla, Seville, Spain

<sup>2</sup>Departamento de Genética, Universidad de Sevilla, Seville, Spain.

<sup>3</sup>Unit of Biochemistry, Department of Biology, University of Fribourg, Fribourg, Switzerland.

<sup>4</sup>Corresponding author

## LEGENDS TO THE SUPPLEMENTARY FIGURES

**Figure S1. Maturation pathway of 5.8S and 25S rRNAs.** The 27SA<sub>2</sub> pre-rRNA, which is generated by either post-transcriptional cleavage of 35S pre-rRNA or co-transcriptional cleavage of nascent RNA polymerase I transcript (not shown), is processed by two alternative pathways. In the major one, about 85% of all 27SA<sub>2</sub> pre-rRNA is cleaved at site A<sub>3</sub> and then exonucleolytically processed to site B<sub>1S</sub> to yield 27SB<sub>S</sub> pre-rRNA. The remaining 15% of 27SA<sub>2</sub> pre-rRNA is directly processed at site B<sub>1L</sub>, producing 27SB<sub>L</sub> pre-rRNA. While processing at sites B<sub>1</sub> is completed, the 3' end of mature 25S rRNA is generated by trimming from site B<sub>0</sub> to site B<sub>2</sub>. The subsequent processing of both 27SB species appears to be identical. Cleavage at site C<sub>2</sub> generates the 25.5S pre-rRNA and the two forms, long and short, of 7S pre-rRNA. Maturation of 25.5S pre-rRNA to 25S rRNA occurs by a two-step 5'-3' exonucleolytic trimming from site C<sub>2</sub>. The 7S pre-rRNAs are converted to mature 5.8S rRNAs by a four-step 3'-5' exonucleolytic process. First, 7S pre-rRNAs are converted to 5.8S+30 pre-rRNAs, then, these precursors are trimmed to 6S pre-rRNAs. The 6S pre-rRNAs are converted to 5.8S+5 pre-rRNAs and these to mature 5.8S rRNAs. The enzymes involved in 7S pre-rRNA processing and their co-factors are shown. Note that, in wild-type cells, the pre-60S r-particles that are exported to the cytoplasm contain mature 25S and 5S rRNAs and either the long or the short form of 6S pre-rRNAs. For more details on yeast pre-rRNA processing, see <sup>1</sup>.

**Figure S2. The GTPase Lsg1 remains cytoplasmic in the *dob1-1* mutant.** (A) Pre-60S r-particles containing 27S pre-rRNAs are not exported to the cytoplasm in the *dob1-1* mutant. The *dob1-1* (*mtr4*) strain was grown at 30 °C in YPD medium to mid-log phase. Immunoprecipitation experiments were carried out using IgG-Sepharose and whole-cell extracts from untagged or TAP-tagged Nop7 and Lsg1 cells. RNA was extracted from the beads (lanes IP) or from an amount of total extract corresponding to 1/100 of that used for the immunoprecipitations (lanes T), separated on a 1.2% agarose-6% formaldehyde gel, transferred to a nylon membrane and subjected to northern hybridization with the probes indicated in parentheses to detect 27S pre-rRNAs and mature 25S rRNA. Probes are described in Figure 2 and Table S2. Signal intensities were measured by phosphorimager scanning; values (below each IP lane) refer to the percentage of each RNA recovered after purification. (B) Lsg1 is localized predominantly to the cytoplasm. Fluorescence microscopy was performed with exponentially growing cells expressing Lsg1-GFP from its cognate promoter in wild-type or *dob1-1* cells. Cells were stained with Hoechst for

localization of nuclei. The GFP and Hoechst signals were visualized by fluorescence microscopy. Arrows point to the position of the nuclei.

**Figure S3. The *dob1-1* cells have no enlarged nucleoli.** Wild-type (*MTR4*) and *dob1-1* (*mtr4*) cells were transformed with a plasmid that expressed Nop1-mRFP and S3-eGFP from their cognate promoters<sup>2</sup> (a gift from J. Bassler). Cells were grown at 30 °C in SD-Leu. Cells were visualized under brightfield illumination (Visible). The subcellular localisation of the GFP-tagged ribosomal protein and the Nop1-mRFP nucleolar marker were analysed by fluorescence microscopy. The nucleoplasm was visualized by Hoechst 33342 staining. Arrows point to nucleolar fluorescence.

**Figure S4. Pre-60S r-particles containing 7S pre-rRNAs are associated with polysomes in the *dob1-1* mutant.** Wild-type (*MTR4*) and *dob1-1* (*mtr4*) cells were grown in YPD medium at 30 °C. Cell extracts were prepared under polysome run-off conditions, by omission of cycloheximide, either in standard buffer (**A**) or in a buffer lacking MgCl<sub>2</sub> to dissociate 80S ribosomes into 40S and 60S r-subunits (**B**). Cell extracts were resolved in 7-50% sucrose gradients and fractionated. Total RNA was extracted from each fraction and analyzed by northern hybridization with probes that reveal 7S pre-rRNAs and mature 5.8S rRNAs. The position of free 40S and 60S r-subunits, 80S ribosomes and polysomes, obtained from the recorded A<sub>254</sub> profiles, are indicated.

**Figure S5. Association of pre-60S r-particles containing 7S pre-rRNAs with polysomes is not significantly enhanced upon TRAMP inactivation.** The TRAMP component Trf4 was deleted in the indicated mutants. A second TRAMP component, Air1, was additionally deleted in the *rrp4-1* mutant background. All mutants were grown at 30 °C in YPD medium to mid-log phase. Cell extracts were prepared and 10 A<sub>260</sub> units of each extract were resolved in 7-50% sucrose gradients and fractionated. RNA was extracted from each fraction and analysed by northern blotting using probes f and e, which reveal 7S pre-rRNAs and mature 5.8S rRNAs, respectively. The position of free 40S and 60S r-subunits, 80S ribosomes and polysomes, obtained from the recorded A<sub>254</sub> profiles, are indicated.

**Figure S6. Functional sites of the *S. cerevisiae* ribosome. View of the X-ray structure of the yeast 80S ribosome.** The approximate positions of the polypeptide exit tunnel (PET), the mRNA path (mRNA), the peptidyl transferase center (PTC), the GTPase-associated center (GAC) and the 3' end of 5.8S rRNA are highlighted. The 25S rRNA from

the large subunit is shown in grey, 5S rRNA in black, 5.8S rRNA in red and the 60S r-proteins in blue. The 18S rRNA from the small subunit is shown in pale green and the 40S r-protein in gold. The cartoon was generated with the UCSF Chimera program <sup>3</sup>, using the crystal structure of the yeast 80S ribosome (PDB files 3U5F, 3U5G, 3U5H and 3U5I, <sup>4</sup>).

**Table S1. Yeast strains used in this study**

| Strain    | Relevant genotype                                                                                    | Reference                 |
|-----------|------------------------------------------------------------------------------------------------------|---------------------------|
| W303-1A   | <i>MATa ade2-1 his3-11,15 leu2-3,112 trp1-1 ura3-1</i>                                               | Ref. <sup>5</sup>         |
| W303-1B   | As W303-1A but <i>MATα</i>                                                                           | Ref. <sup>5</sup>         |
| MS157-1A  | As W303-1A but <i>dob1-1</i>                                                                         | Ref. <sup>6</sup>         |
| MS157-13B | As W303-1B but <i>dob1-1</i>                                                                         | Ref. <sup>6</sup>         |
| JDY4      | As W303-1B but <i>rrp4::HIS3</i> [pRS415-rrp4-1]                                                     | Ref. <sup>6</sup>         |
| R95-1-1   | <i>MATa ade2-1 ade3 cep1Δ cry1 cyh2 his4-580 leu2 lys2 ura3 tyr1 SUP4-3</i><br>[pAP2-CEP1/LEU2/ADE3] | Ref. <sup>7</sup>         |
| BM3-40A   | As R95-1-1 but <i>csf4-1</i>                                                                         | Ref. <sup>7</sup>         |
| YTK301    | <i>MATα ura3-52 mtr3-1</i>                                                                           | Ref. <sup>8</sup>         |
| YAM587    | As W303-1A but <i>rrp6::kanMX4</i>                                                                   | Ref. <sup>9</sup>         |
| BY4741    | <i>MATa his3Δ0 leu2Δ0 met15Δ0 ura3Δ0</i>                                                             | Euroscarf                 |
| Y1909     | As BY4741 but <i>rrp47::kanMX4</i>                                                                   | Euroscarf                 |
| Y871      | As BY4741 but <i>ngl2::kanMX4</i>                                                                    | Euroscarf                 |
| JDY1234   | As W303-1A but <i>NOP7-TAP::natNT2</i>                                                               | This study <sup>(a)</sup> |
| JDY1235   | As W303-1A but <i>ARX1-TAP::natNT2</i>                                                               | This study <sup>(a)</sup> |
| JDY1236   | As W303-1A but <i>LSG1-TAP::natNT2</i>                                                               | This study <sup>(a)</sup> |
| Y3906     | As W303-1B but <i>RPL24A-TAP::HIS3MX4</i>                                                            | This study <sup>(b)</sup> |
| JDY1238   | As W303-1A but <i>dob1-1 NOP7-TAP::natNT2</i>                                                        | This study <sup>(b)</sup> |
| JDY1239   | As W303-1B but <i>dob1-1 ARX1-TAP::natNT2</i>                                                        | This study <sup>(b)</sup> |
| JDY1240   | As W303-1B but <i>dob1-1 LSG1-TAP::natNT2</i>                                                        | This study <sup>(b)</sup> |
| JDY1237   | As W303-1A but <i>dob1-1 RPL24A-TAP::HIS3MX4</i>                                                     | This study <sup>(b)</sup> |
| JDY1241   | As W303-1B but <i>rrp4::HIS3</i> [pRS415-rrp4-1] <i>NOP7-TAP::natNT2</i>                             | This study <sup>(c)</sup> |
| JDY1242   | As W303-1B but <i>rrp4::HIS3</i> [pRS415-rrp4-1] <i>LSG1-TAP::natNT2</i>                             | This study <sup>(c)</sup> |
| Y6265     | As BY4741 but <i>trf4::kanMX4</i>                                                                    | Euroscarf                 |
| Y196      | As W303-1A but <i>trf4::HIS3MX4</i>                                                                  | This study <sup>(d)</sup> |
| Y207      | As W303-1A but <i>air1::HIS3MX4</i>                                                                  | This study <sup>(d)</sup> |
| JDY1106   | As R95-1-1 but <i>csf4-1 trf4::kanMX4</i>                                                            | This study <sup>(e)</sup> |
| JDY1104   | As YTK301 but <i>trf4::kanMX4</i>                                                                    | This study <sup>(e)</sup> |
| JDY1246   | As W303-1B but <i>rrp4::HIS3</i> [pRS415-rrp4-1] <i>trf4::kanMX4</i>                                 | This study <sup>(e)</sup> |
| JDY1247   | As W303-1B but <i>rrp4::HIS3</i> [pRS415-rrp4-1] <i>trf4::kanMX4 air1::HIS3MX4</i>                   | This study <sup>(f)</sup> |
| JDY911    | As W303-1A but <i>LSG1-GFP::natNT2</i>                                                               | Ref. <sup>10</sup>        |
| JDY1248   | As W303-1A but <i>dob1-1 LSG1-GFP::natNT2</i>                                                        | This study <sup>(g)</sup> |

- (a) Strains JDY1234, JDY1235 and JDY1236 are meiotic segregants of the genetic cross between W303-1B and strains Y3852, Y3858 and Y3860, respectively, described in <sup>11</sup>; all these strains differ in the genes subjected to the integration of the C-terminal TAP-tag and have in common the genotype of strain Y4219 (As W303-1A but *rix7::kanMX6 ade3::kanMX4 NSA1-GFP::HIS3MX6 [pHT4467Δ-RIX7]*) <sup>11</sup>.
- (b) Strain Y3906 was generated by integration of a C-terminal TAP tag at the genomic locus, performed by a standard procedure <sup>12</sup>.
- (c) Strains JDY1241 and JDY1242 are meiotic segregants of the genetic cross between JDY4 and strains JDY1234 and 1236, respectively.
- (d) Strains Y196 and Y207 were generated by deletion disruption of the *TRF4* and *AIR1* genes, respectively, with the cassette HIS3MX4, performed by a standard procedure <sup>12</sup>.
- (e) Strains JDY1106, JDY1104 and JDY1246 were obtained by deletion disruption of the *TRF4* gene in strains BM3-40A, YTK301 and JDY4, respectively. The *trf4::kanMX4* cassette was amplified from genomic DNA of strain Y6265.
- (f) Strain JDY1247 is a meiotic segregant of the genetic cross between JDY1246 and Y207.
- (g) Strain JDY1248 is meiotic segregant of the genetic cross between MS157-13B and JDY911.

**Table S2. Oligonucleotides used in this study**

| <b>Name <sup>(a)</sup></b> | <b>5'-3' Sequence</b>                              |
|----------------------------|----------------------------------------------------|
| Probe e<br>(5.8S)          | TTTCGCTGCGTTCTTCATC                                |
| Probe f<br>(E/C2)          | GGCCAGCAATTTCAAGTTA                                |
| Probe g<br>(C1/C2)         | GAACATTGTTCGCCTAGA                                 |
| Probe h (25S)              | CTCCGCTTATTGATATGC                                 |
| Probe 5S                   | GGTCACCCACTACTACTCGG                               |
| FISH ITS1                  | ATGCTCTTGCCAAAACAAAAAATCCATTTTCAAATTATTAAATTTCT    |
| FISH ITS2-1                | AGGCCAGCAATTTCAAGTTAACTCCAAAGAGTATCACTC            |
| FISH ITS2-2                | AGAACATTGTTCGCCTAGACGCTCTCTTCTTATCGATAACGTTCCAATAC |

<sup>(a)</sup> All primers used to delete genes, construct fusions or verify strains are not shown in this table and are available upon request.

**SUPPLEMENTARY REFERENCES**

1. Fernández-Pevida A, Kressler D, de la Cruz J. Processing of preribosomal RNA in *Saccharomyces cerevisiae*. Wiley Interdiscip Rev RNA 2015; 6:191-209.
2. Ulbrich C, Diepholz M, Bassler J, Kressler D, Pertschy B, Galani K, et al. Mechanochemical removal of ribosome biogenesis factors from nascent 60S ribosomal subunits. Cell 2009; 138:911-22.
3. Pettersen EF, Goddard TD, Huang CC, Couch GS, Greenblatt DM, Meng EC, et al. UCSF Chimera—a visualization system for exploratory research and analysis. J Comput Chem 2004; 25:1605-12.
4. Ben-Shem A, Garreau de Loubresse N, Melnikov S, Jenner L, Yusupova G, Yusupov M. The structure of the eukaryotic ribosome at 3.0 Å resolution. Science 2011; 334:1524-9.
5. Thomas BJ, Rothstein R. Elevated recombination rates in transcriptionally active DNA. Cell 1989; 56:619-30.
6. de la Cruz J, Kressler D, Tollervey D, Linder P. Dob1p (Mtr4p) is a putative ATP-dependent RNA helicase required for the 3' end formation of 5.8S rRNA in *Saccharomyces cerevisiae*. EMBO J 1998; 17:1128-40.
7. van Hoof A, Staples RR, Baker RE, Parker R. Function of the Ski4p (Csl4p) and Ski7p proteins in 3'-to-5' degradation of mRNA. Mol Cell Biol 2000; 20:8230-43.
8. Kadowaki T, Schneider R, Hitomi M, Tartakoff AM. Mutations in nucleolar proteins lead to nucleolar accumulation of polyA<sup>+</sup> RNA in *Saccharomyces cerevisiae*. Mol Biol Cell 1995; 6:1103-10.
9. Berretta J, Pinskaya M, Morillon A. A cryptic unstable transcript mediates transcriptional trans-silencing of the Ty1 retrotransposon in *S. cerevisiae*. Genes Dev 2008; 22:615-26.
10. Fernández-Pevida A, Rodríguez-Galán O, Díaz-Quintana A, Kressler D, de la Cruz J. Yeast ribosomal protein L40 assembles late into precursor 60S ribosomes and is required for their cytoplasmic maturation. J Biol Chem 2012; 287:38390-407.
11. Kressler D, Roser D, Pertschy B, Hurt E. The AAA ATPase Rix7 powers progression of ribosome biogenesis by stripping Nsa1 from pre-60S particles. J Cell Biol 2008; 181:935-44.
12. Longtine MS, McKenzie III A, Demarini DJ, Shah NG, Wach A, Brachat A, et al. Additional modules for versatile and economical PCR-based gene deletion and modification in *Saccharomyces cerevisiae*. Yeast 1998; 14:953-61.



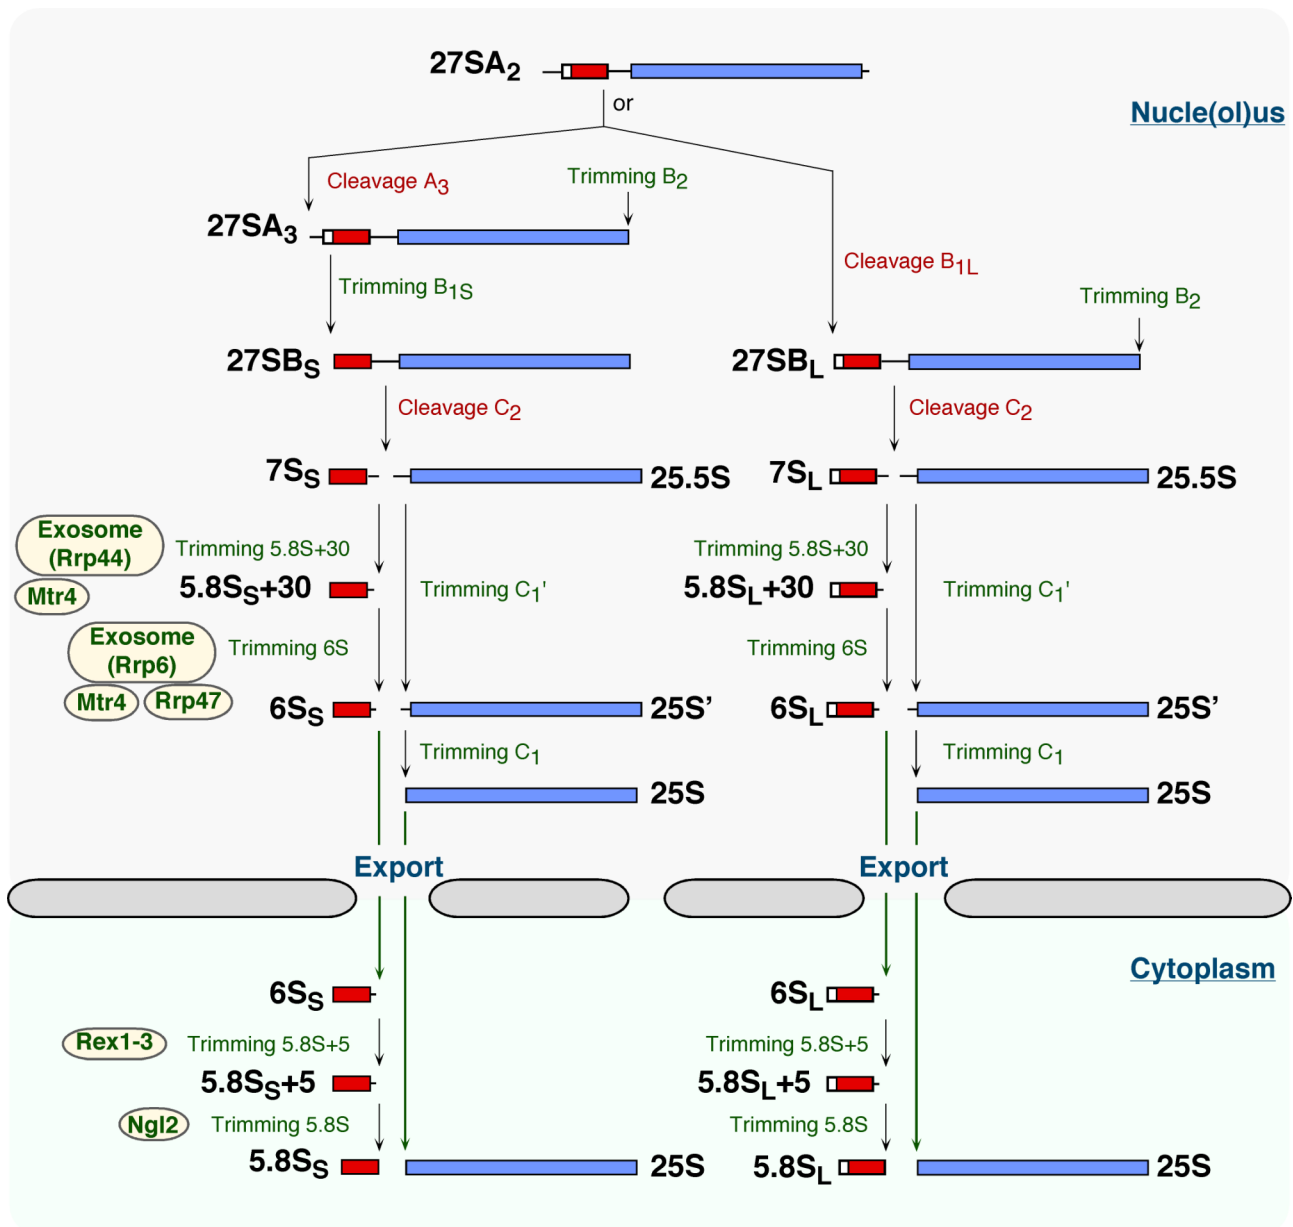

Figure S1

**A**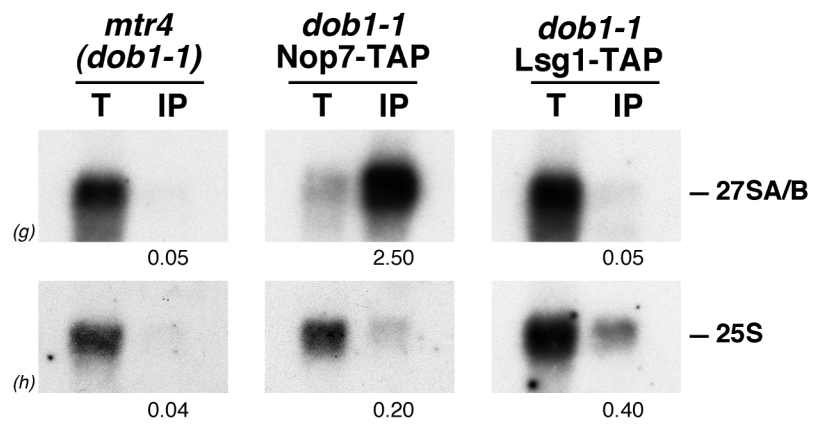**B**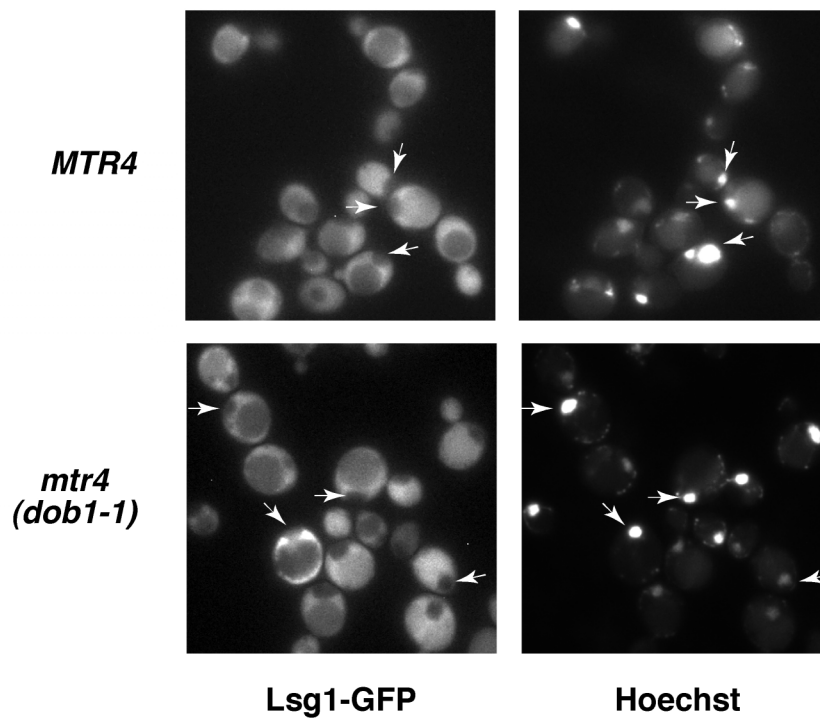

Figure S2

***MTR4***

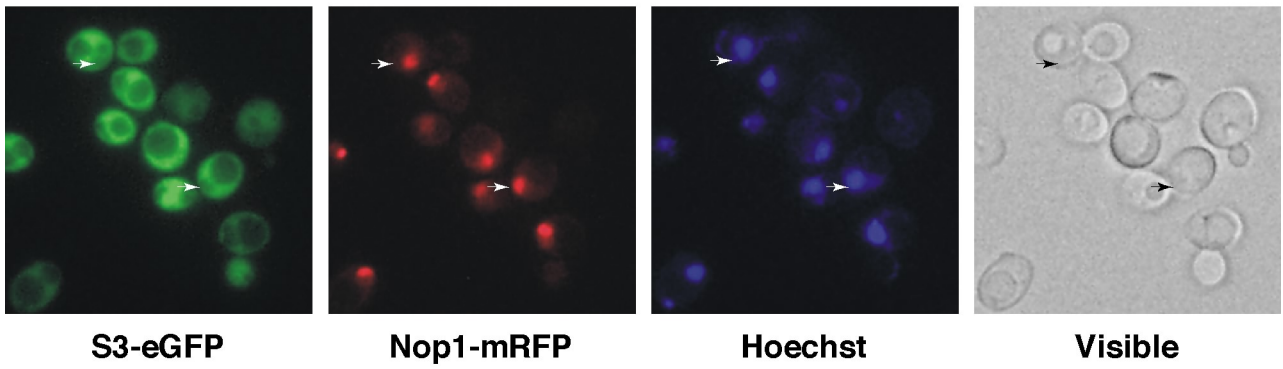

***mtr4 (dob1-1)***

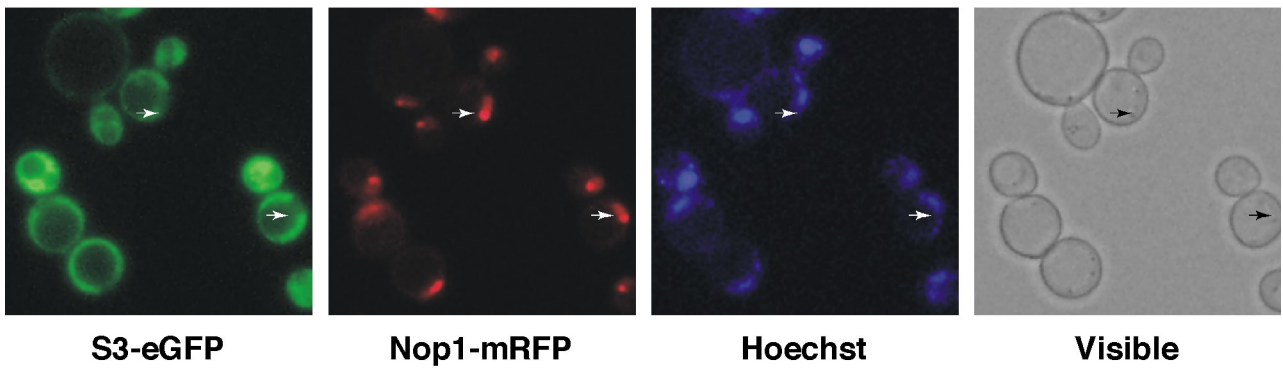

**Figure S3**

**A*****MTR4***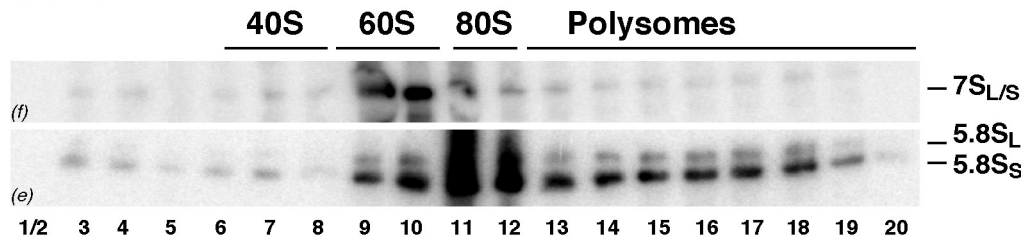***mtr4 (dob1-1)***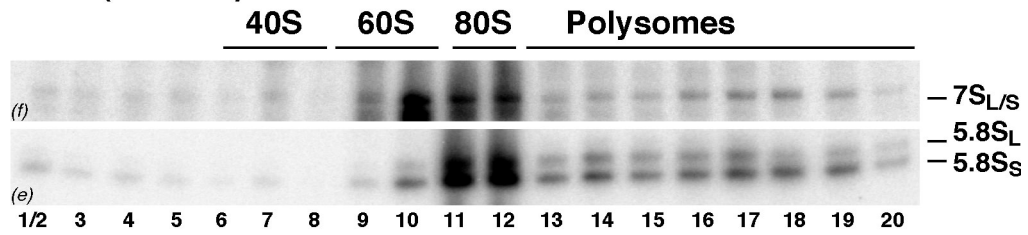**B*****MTR4***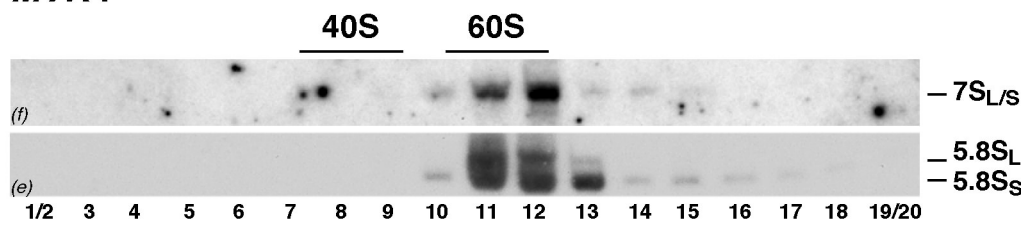***mtr4 (dob1-1)***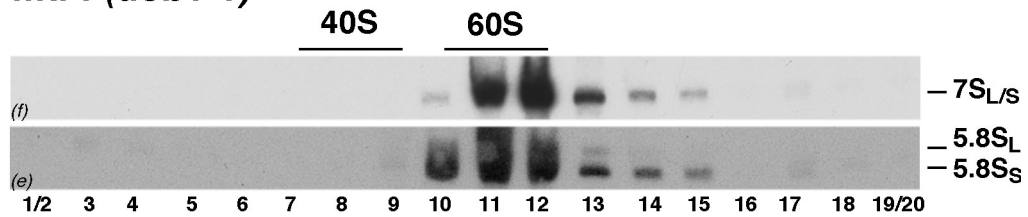**Figure S4**

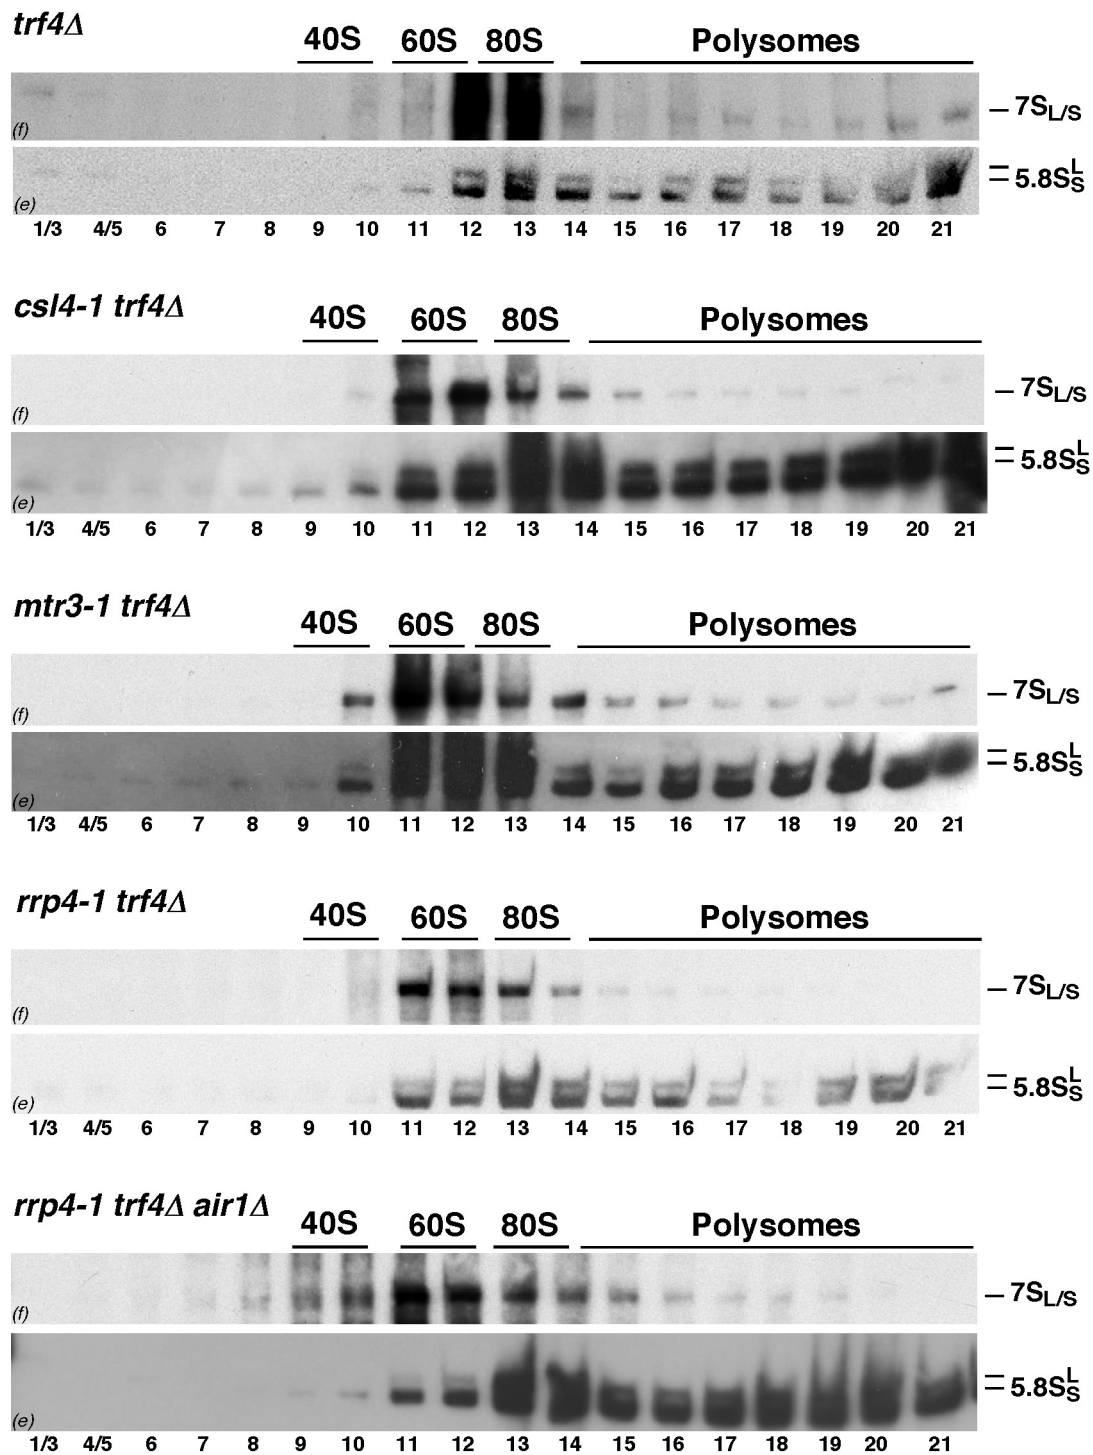

Figure S5

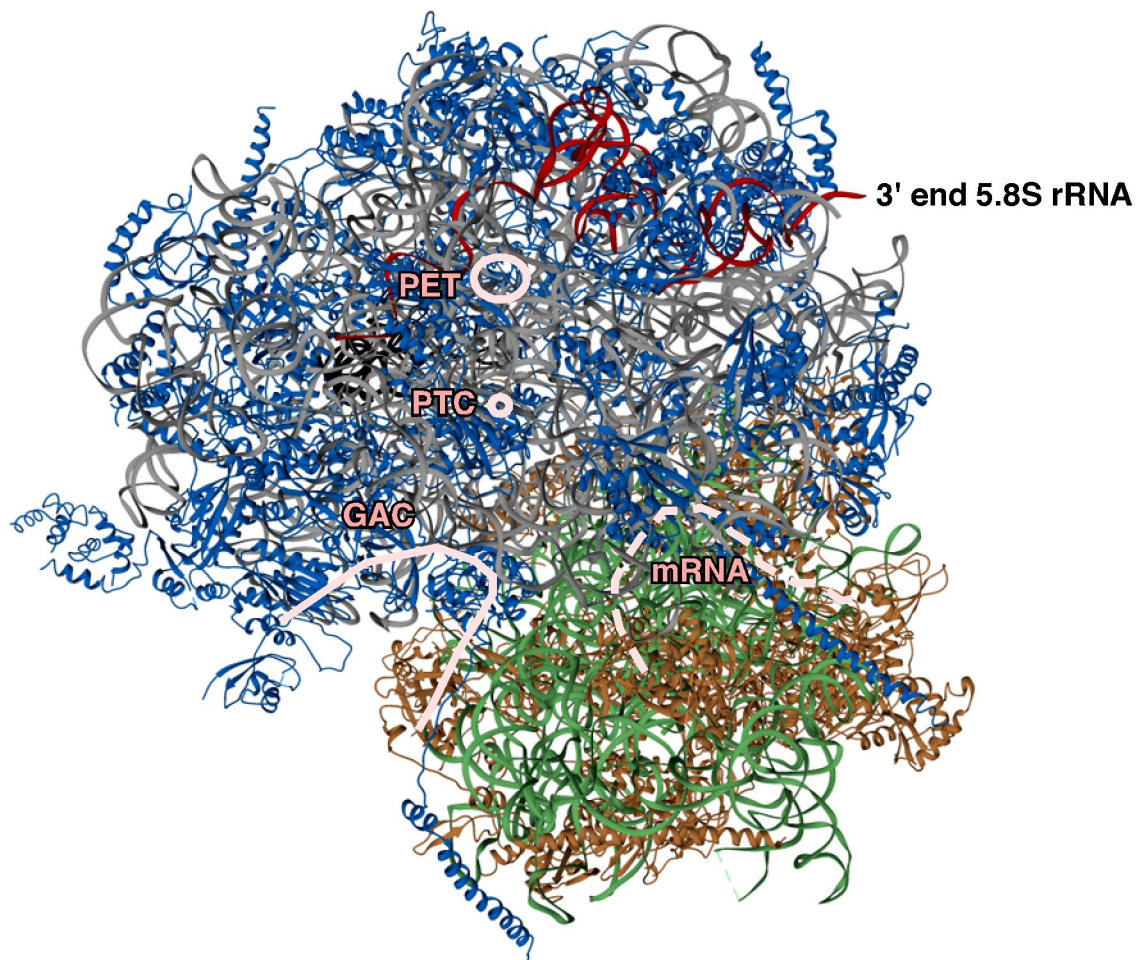

Figure S6
